# Supplementary material for: Interplay between spin–orbital coupling and electron-correlation: induction of phase transitions and giant magnetic anisotropy in strained LaSr1−xCaxNiReO6
Source: Royal Society of Chemistry journal article supplement (doi:10.1039/d2cp01673g), 2022-01-01
Supplement: d2cp01673g1.pdf [file d2cp01673g1.pdf]

## Supporting Information

### Interplay between Spin-Orbital Coupling and Electron Correlation: Induction of Phase Transitions and Giant Magnetic Anisotropy in Strained $\text{LaSr}_{1-x}\text{Ca}_x\text{NiReO}_6$

S. Faiza-Rubab<sup>†</sup> and S. Nazir<sup>†\*</sup>

*Department of Physics, University of Sargodha, Sargodha Campus, 40100 Sargodha, Pakistan.*

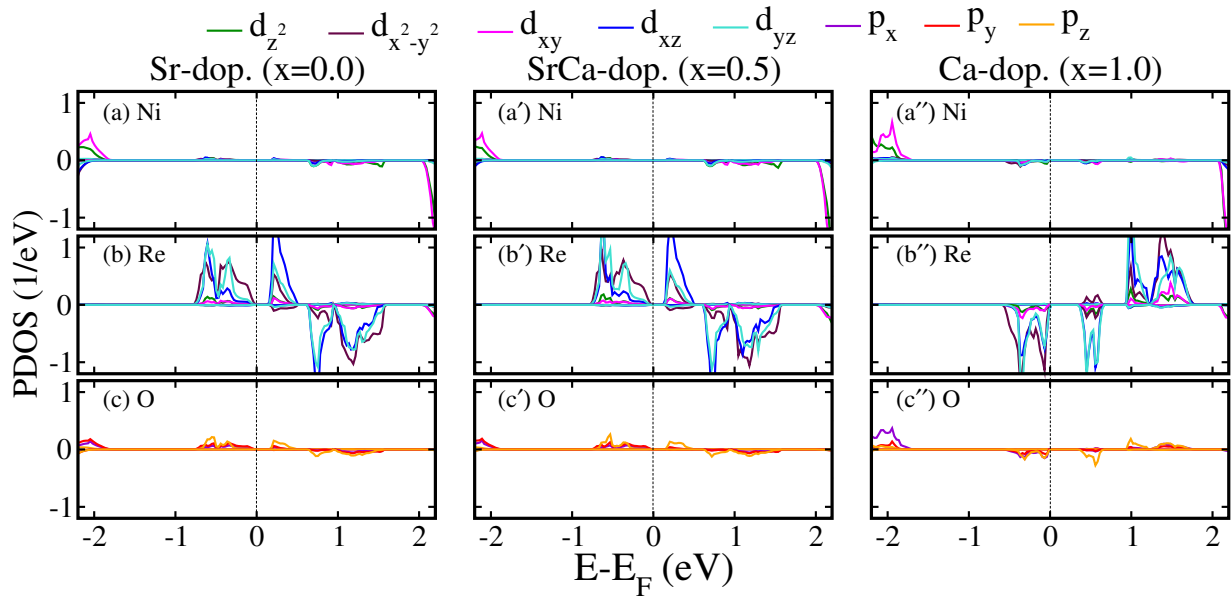

FIG. 1S: Calculated spin-polarized partial density of states (PDOS) within a GGA+ $U$ +SOC method for (a/a'/a'') Ni 3d (first row), (b/b'/b'') Re 5d (second row), and (c/c'/c'') O 2p (third row) orbitals of Sr-dop. ( $x = 0.0$ ) in the left column/SrCa-dop. ( $x = 0.5$ ) in the middle column/Ca-dop. ( $x = 1.0$ ) in the right column in unstrained  $\text{LaSr}_{1-x}\text{Ca}_x\text{NiReO}_6$  ( $x = 0.0/0.5/1.0$ ) double perovskite oxide, respectively.

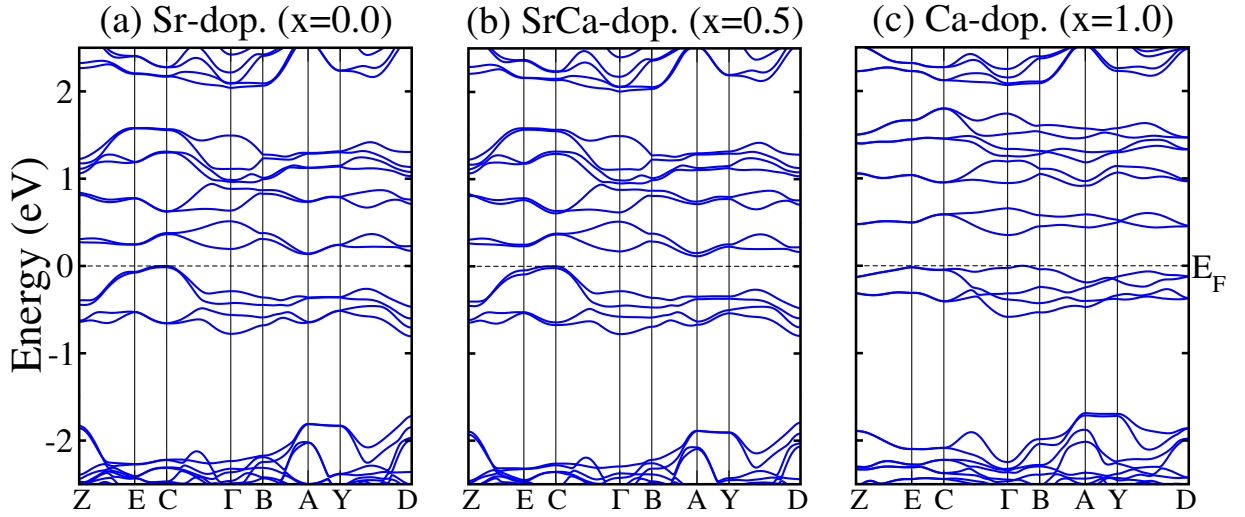

FIG. 2S: Calculated band structures of the  $\text{LaSr}_{1-x}\text{Ca}_x\text{NiReO}_6$  double perovskite oxide for (a) Sr-dop. ( $x = 0.0$ ), (b) SrCa-dop. ( $x = 0.5$ ), and (c) Ca-dop. ( $x = 1.0$ ) within the GGA+ $U$ +SOC method in the respective stable magnetic ground states in each case. For clarity, the horizontal dotted line represents the Fermi level.

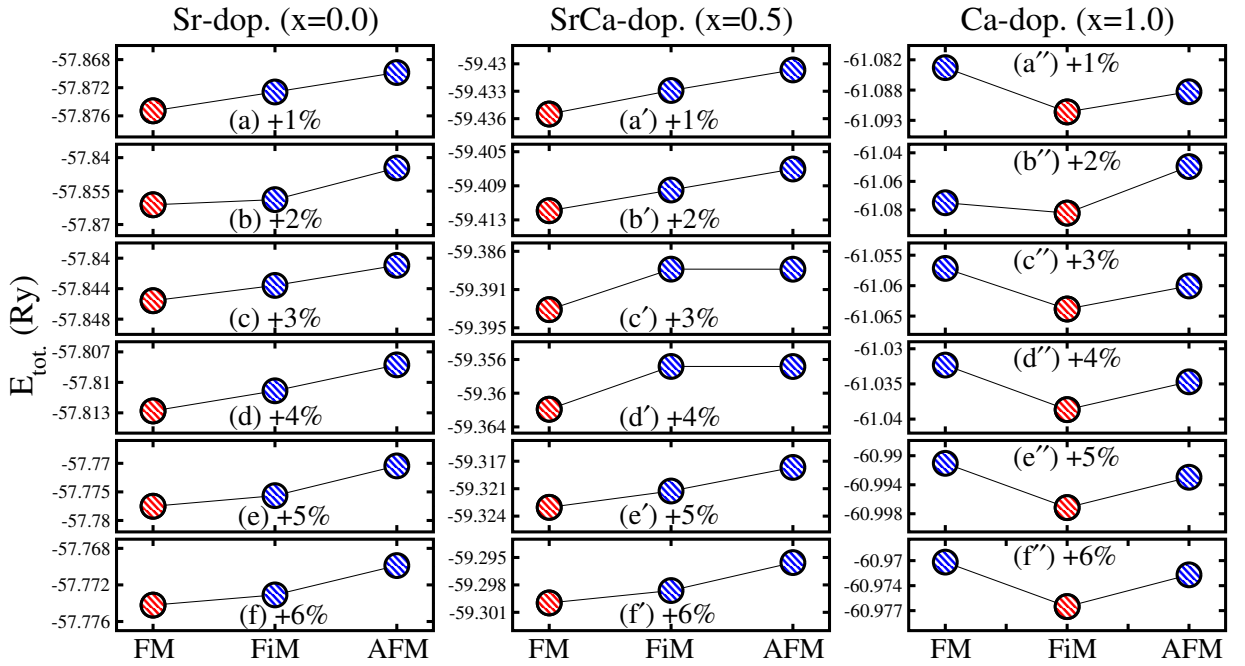

FIG. 3S: (Color online) Calculated total magnetic energies ( $E_{tot.}$ ) of the  $\text{LaSr}_{1-x}\text{Ca}_x\text{NiReO}_6$  double perovskite oxide for (a/b/c/d/e/f) Sr-dop. ( $x = 0.0$ ) in the left column, (a'/b'/c'/d'/e'/f') SrCa-dop. ( $x = 0.5$ ) in the middle column, and (a''/b''/c''/d''/e''/f'') Ca-dop. ( $x = 1.0$ ) in the right column for biaxial tensile +1%/+2%/+3%/+4%/+5%/+6% strains along the [110]-direction as a function of ferromagnetic (FM)/ferrimagnetic (FiM)/antiferromagnetic (AFM) spin ordering within GGA+ $U$ +SOC method. For clarity, the magnetic ground states in each case are visualized by the red circles.

\* Electronic address: safdar.nazir@uos.edu.pk, Tel: +92-334-971-9060

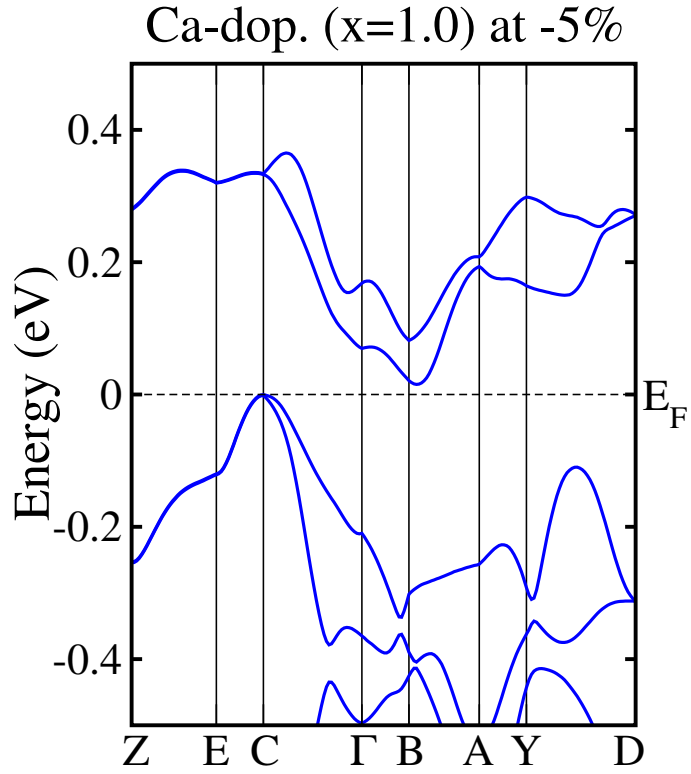

FIG. 4S: (Color online) Calculated band structures of the  $\text{LaSr}_{1-x}\text{Ca}_x\text{NiReO}_6$  double perovskite oxide for Ca-dop. ( $x = 1.0$ ) within the GGA+ $U$ +SOC method in the respective stable magnetic ground state at a critical strain of  $-5\%$  compressive strain.

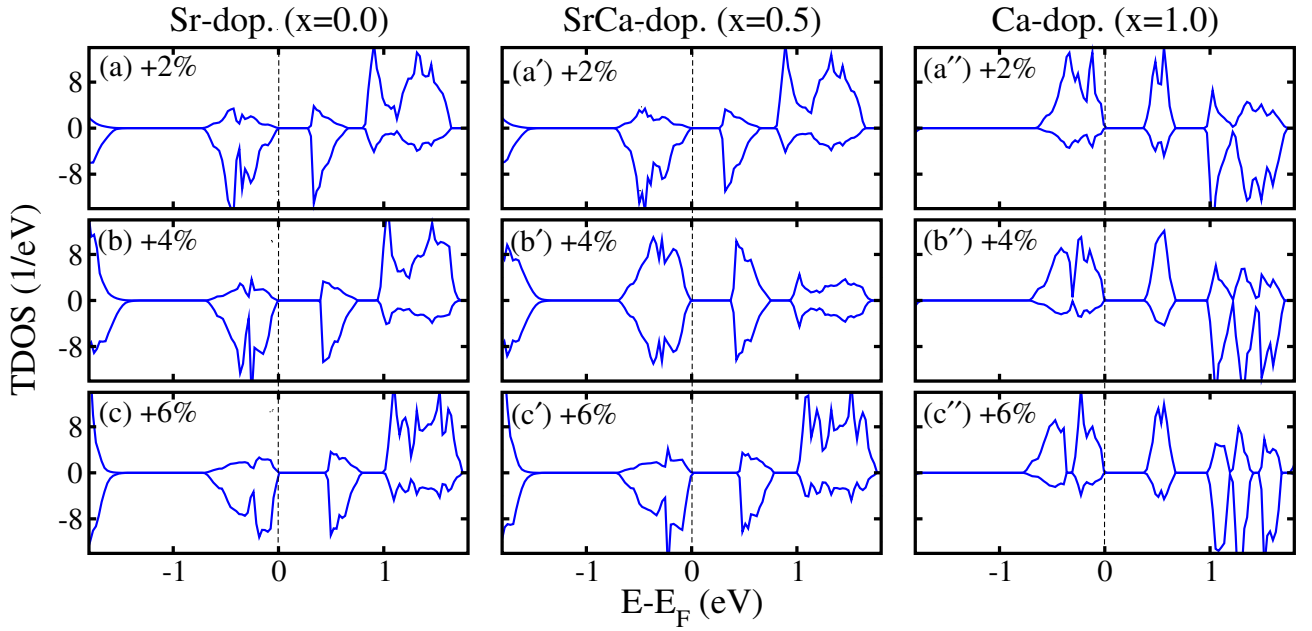

FIG. 5S: (Color online) Calculated spin-polarized total density of states (TDOS) of the  $\text{LaSr}_{1-x}\text{Ca}_x\text{NiReO}_6$  double perovskite oxide for (a/b/c) Sr-dop. ( $x = 0.0$ ) in the left column, (a'/b'/c') SrCa-dop. ( $x = 0.5$ ) in the middle column, and (a''/b''/c'') Ca-dop. ( $x = 1.0$ ) in the right column as a function of biaxial tensile  $+2\%/+4\%/+6\%$  strains along the  $[110]$ -direction within GGA+ $U$ +SOC method.

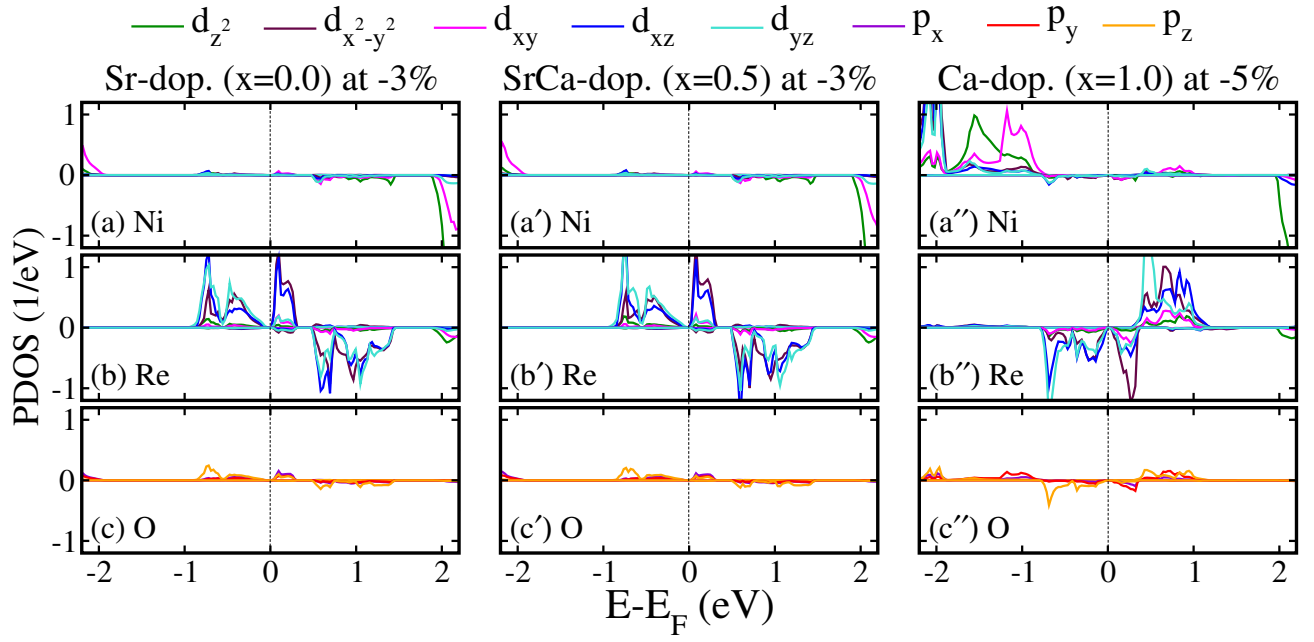

FIG. 6S: (Color online) Calculated spin-polarized partial density of states (PDOS) within a GGA+ $U$ +SOC method for (a/a'/a'') Ni 3d (first row), (b/b'/b'') Re 5d (second row), and (c/c'/c'') O 2p (third row) orbitals Sr-dop. ( $x = 0.0$ ) in the left column/SrCa-dop. ( $x = 0.5$ ) in the middle column/Ca-dop. ( $x = 1.0$ ) in the right column in unstrained  $\text{LaSr}_{1-x}\text{Ca}_x\text{NiReO}_6$  double perovskite oxides, respectively.

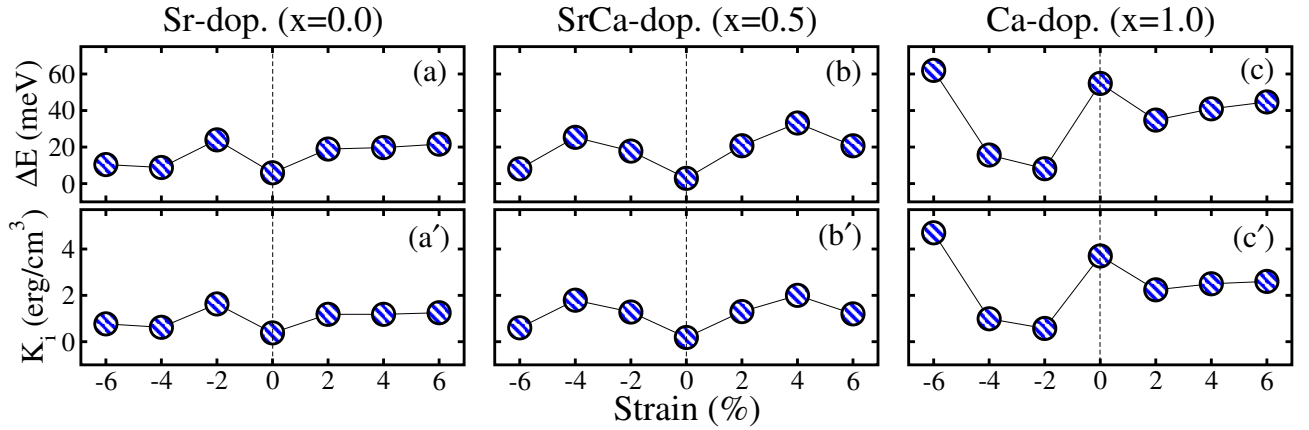

FIG. 7S: (Color online) Calculated  $\Delta E$  (the difference between the two consecutive lowest energy levels along with the crystallographic axis in which the spin magnetization is applied) in the first row and  $K_i$  (the magnetocrystalline anisotropy energy constant) in the second row as a function of biaxial strain along the [110]-direction of the  $\text{LaSr}_{1-x}\text{Ca}_x\text{NiReO}_6$  double perovskite oxide for (a and a') Sr-dop. ( $x = 0.0$ ) in the first column, (b and b') SrCa-dop. ( $x = 0.5$ ) in the second column, and (c and c') Ca-dop. ( $x = 1.0$ ) in the third column within the GGA+ $U$ +SOC method in the respective stable magnetic ground states.

VASP (Previous Results)

WIEN2K (Present Results)

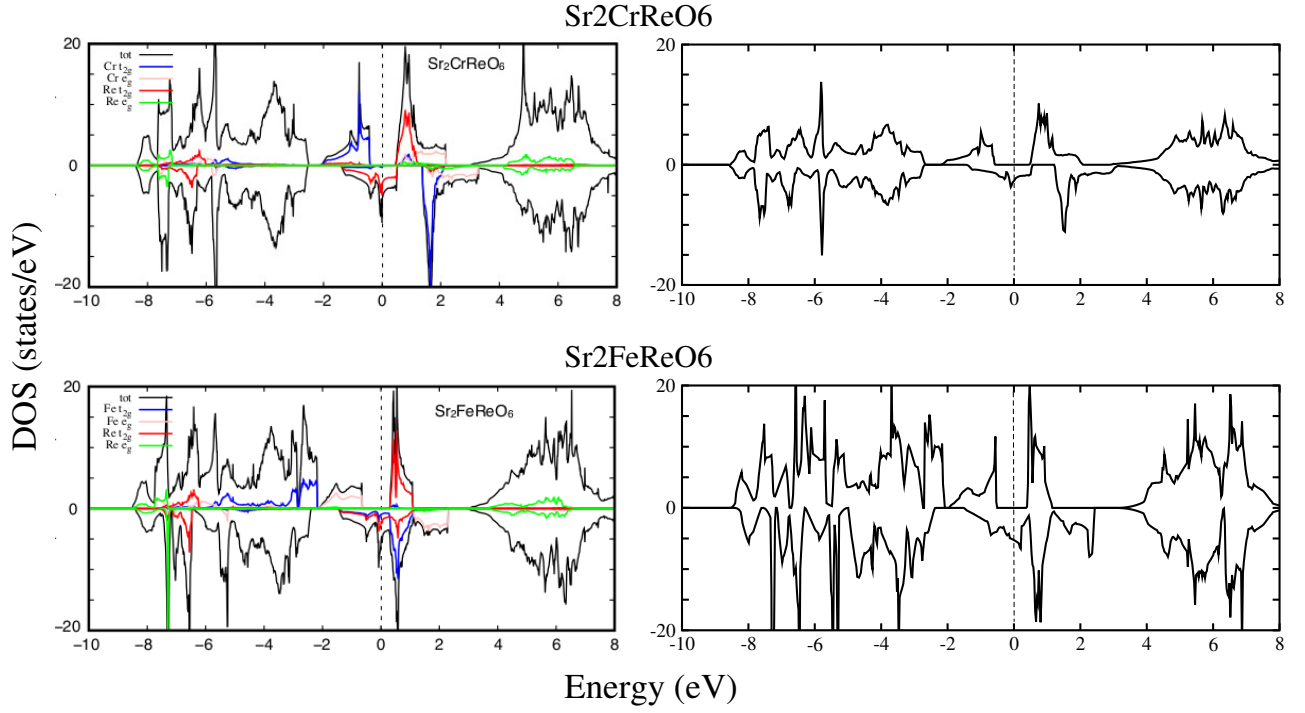

Sr<sub>2</sub>CaIrO<sub>6</sub>

Sr<sub>2</sub>MgIrO<sub>6</sub>

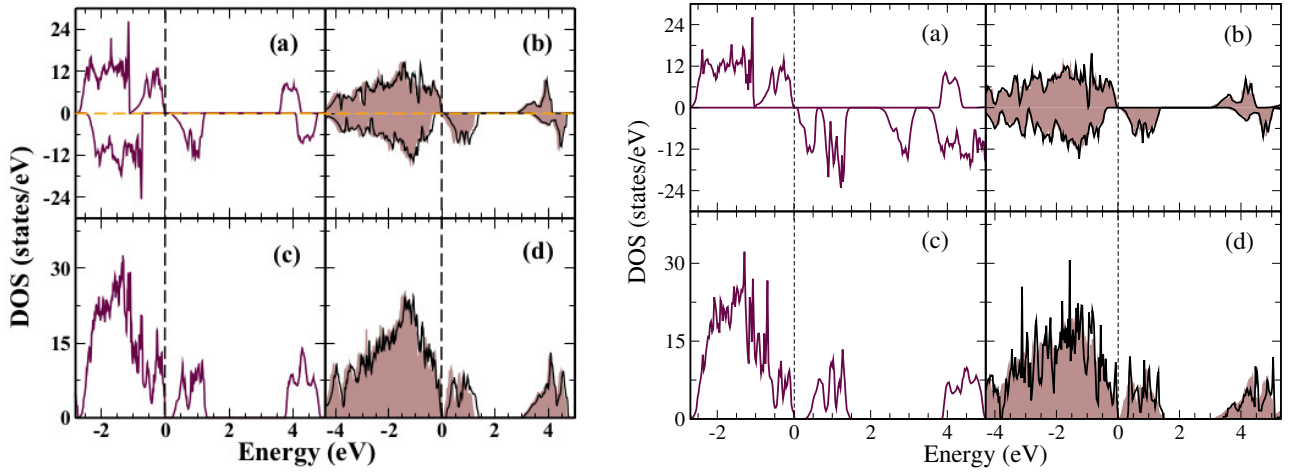

FIG. 8S: (Color online) A comparison of the calculated density of states (DOS) using VASP (previous results) in the left column and WIEN2K (present results) in the right column for different four double perovskite oxides such as Sr<sub>2</sub>CrReO<sub>6</sub>, Sr<sub>2</sub>CrFeO<sub>6</sub>, Sr<sub>2</sub>CaIrO<sub>6</sub>, and Sr<sub>2</sub>MgIrO<sub>6</sub>.
